# Supplementary material for: Fast and flexible sequence induction in spiking neural networks via rapid excitability changes
Source: eLife journal article supplement (doi:10.7554/elife.44324), 2019-05-13
Supplement: supp [file elife-44324-supp-v1.zip]

Archive with 3 entries (3 files):
- elife_poa_e44324_Figure_1_figure_supplement_1.jpg
- elife_poa_e44324_Transparent_Reporting_File.pdf
- elife_poa_e44324_Figure_2_figure_supplement_1.jpg
