# Supplementary figures and images for: Fast and flexible sequence induction in spiking neural networks via rapid excitability changes
Source: eLife journal article supplement (doi:10.7554/elife.44324), 2019-05-13

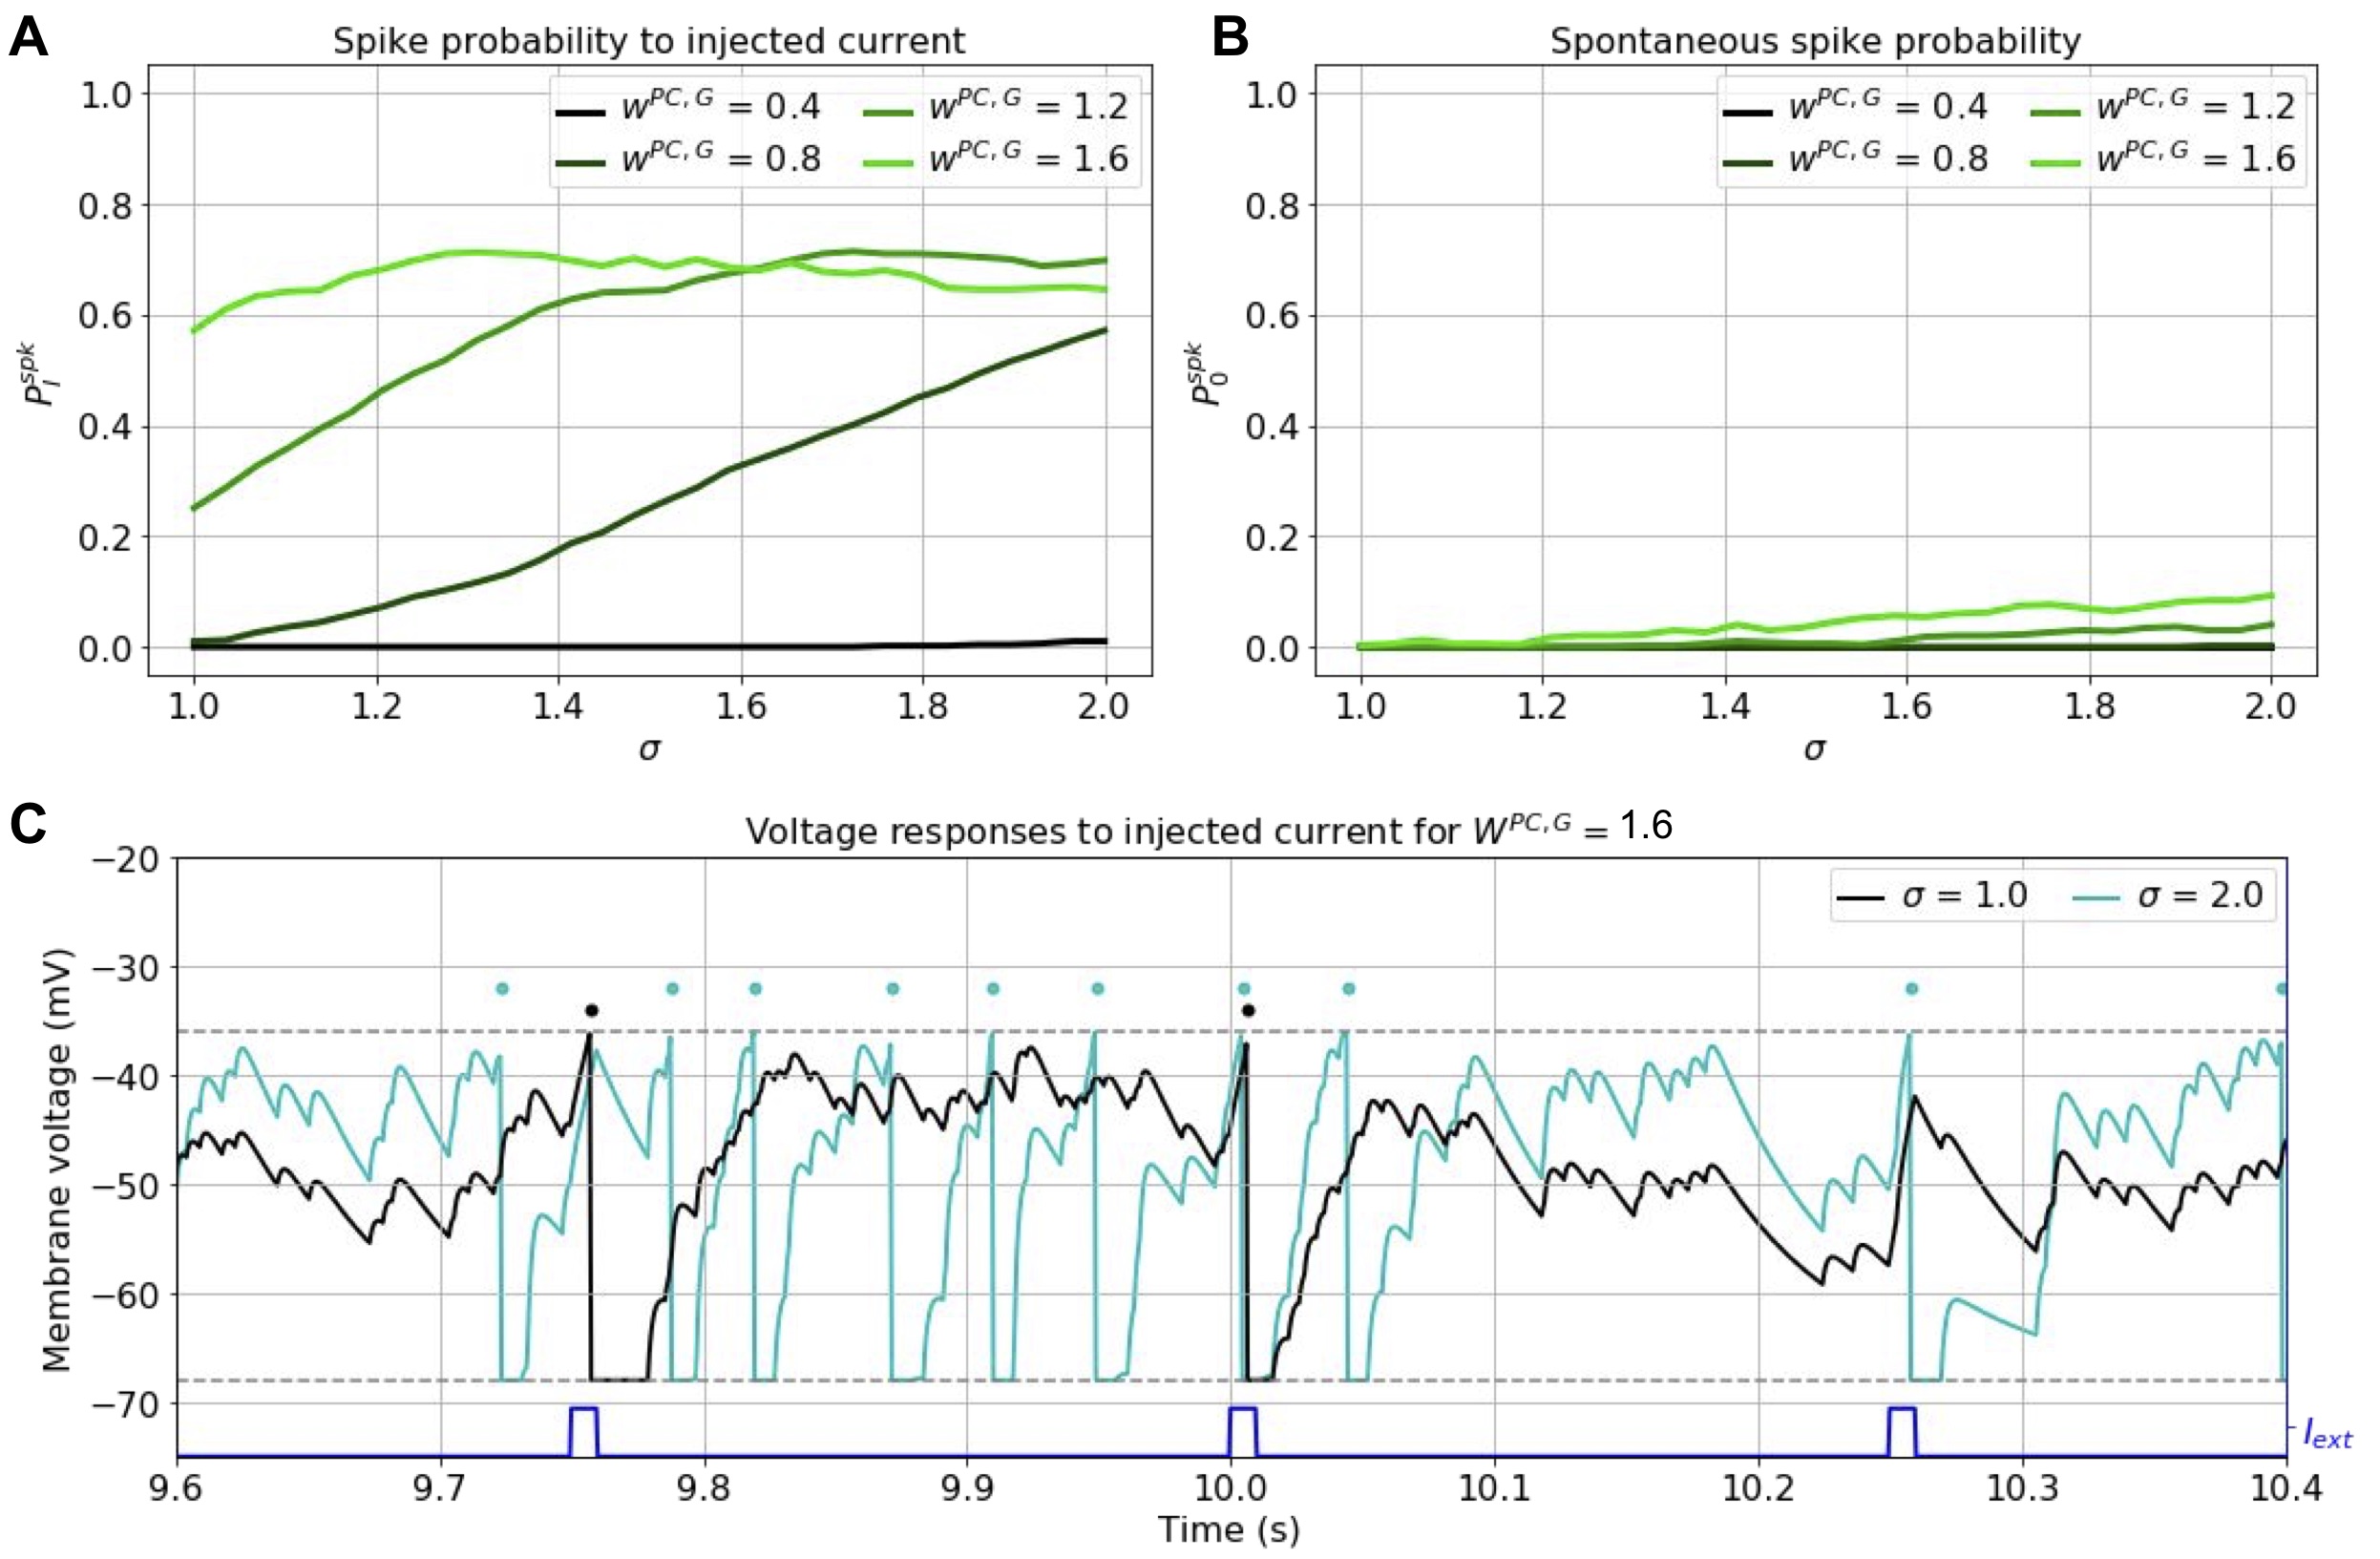

Supplement: supp [file elife-44324-supp-v1.zip › elife_poa_e44324_Figure_1_figure_supplement_1.jpg]

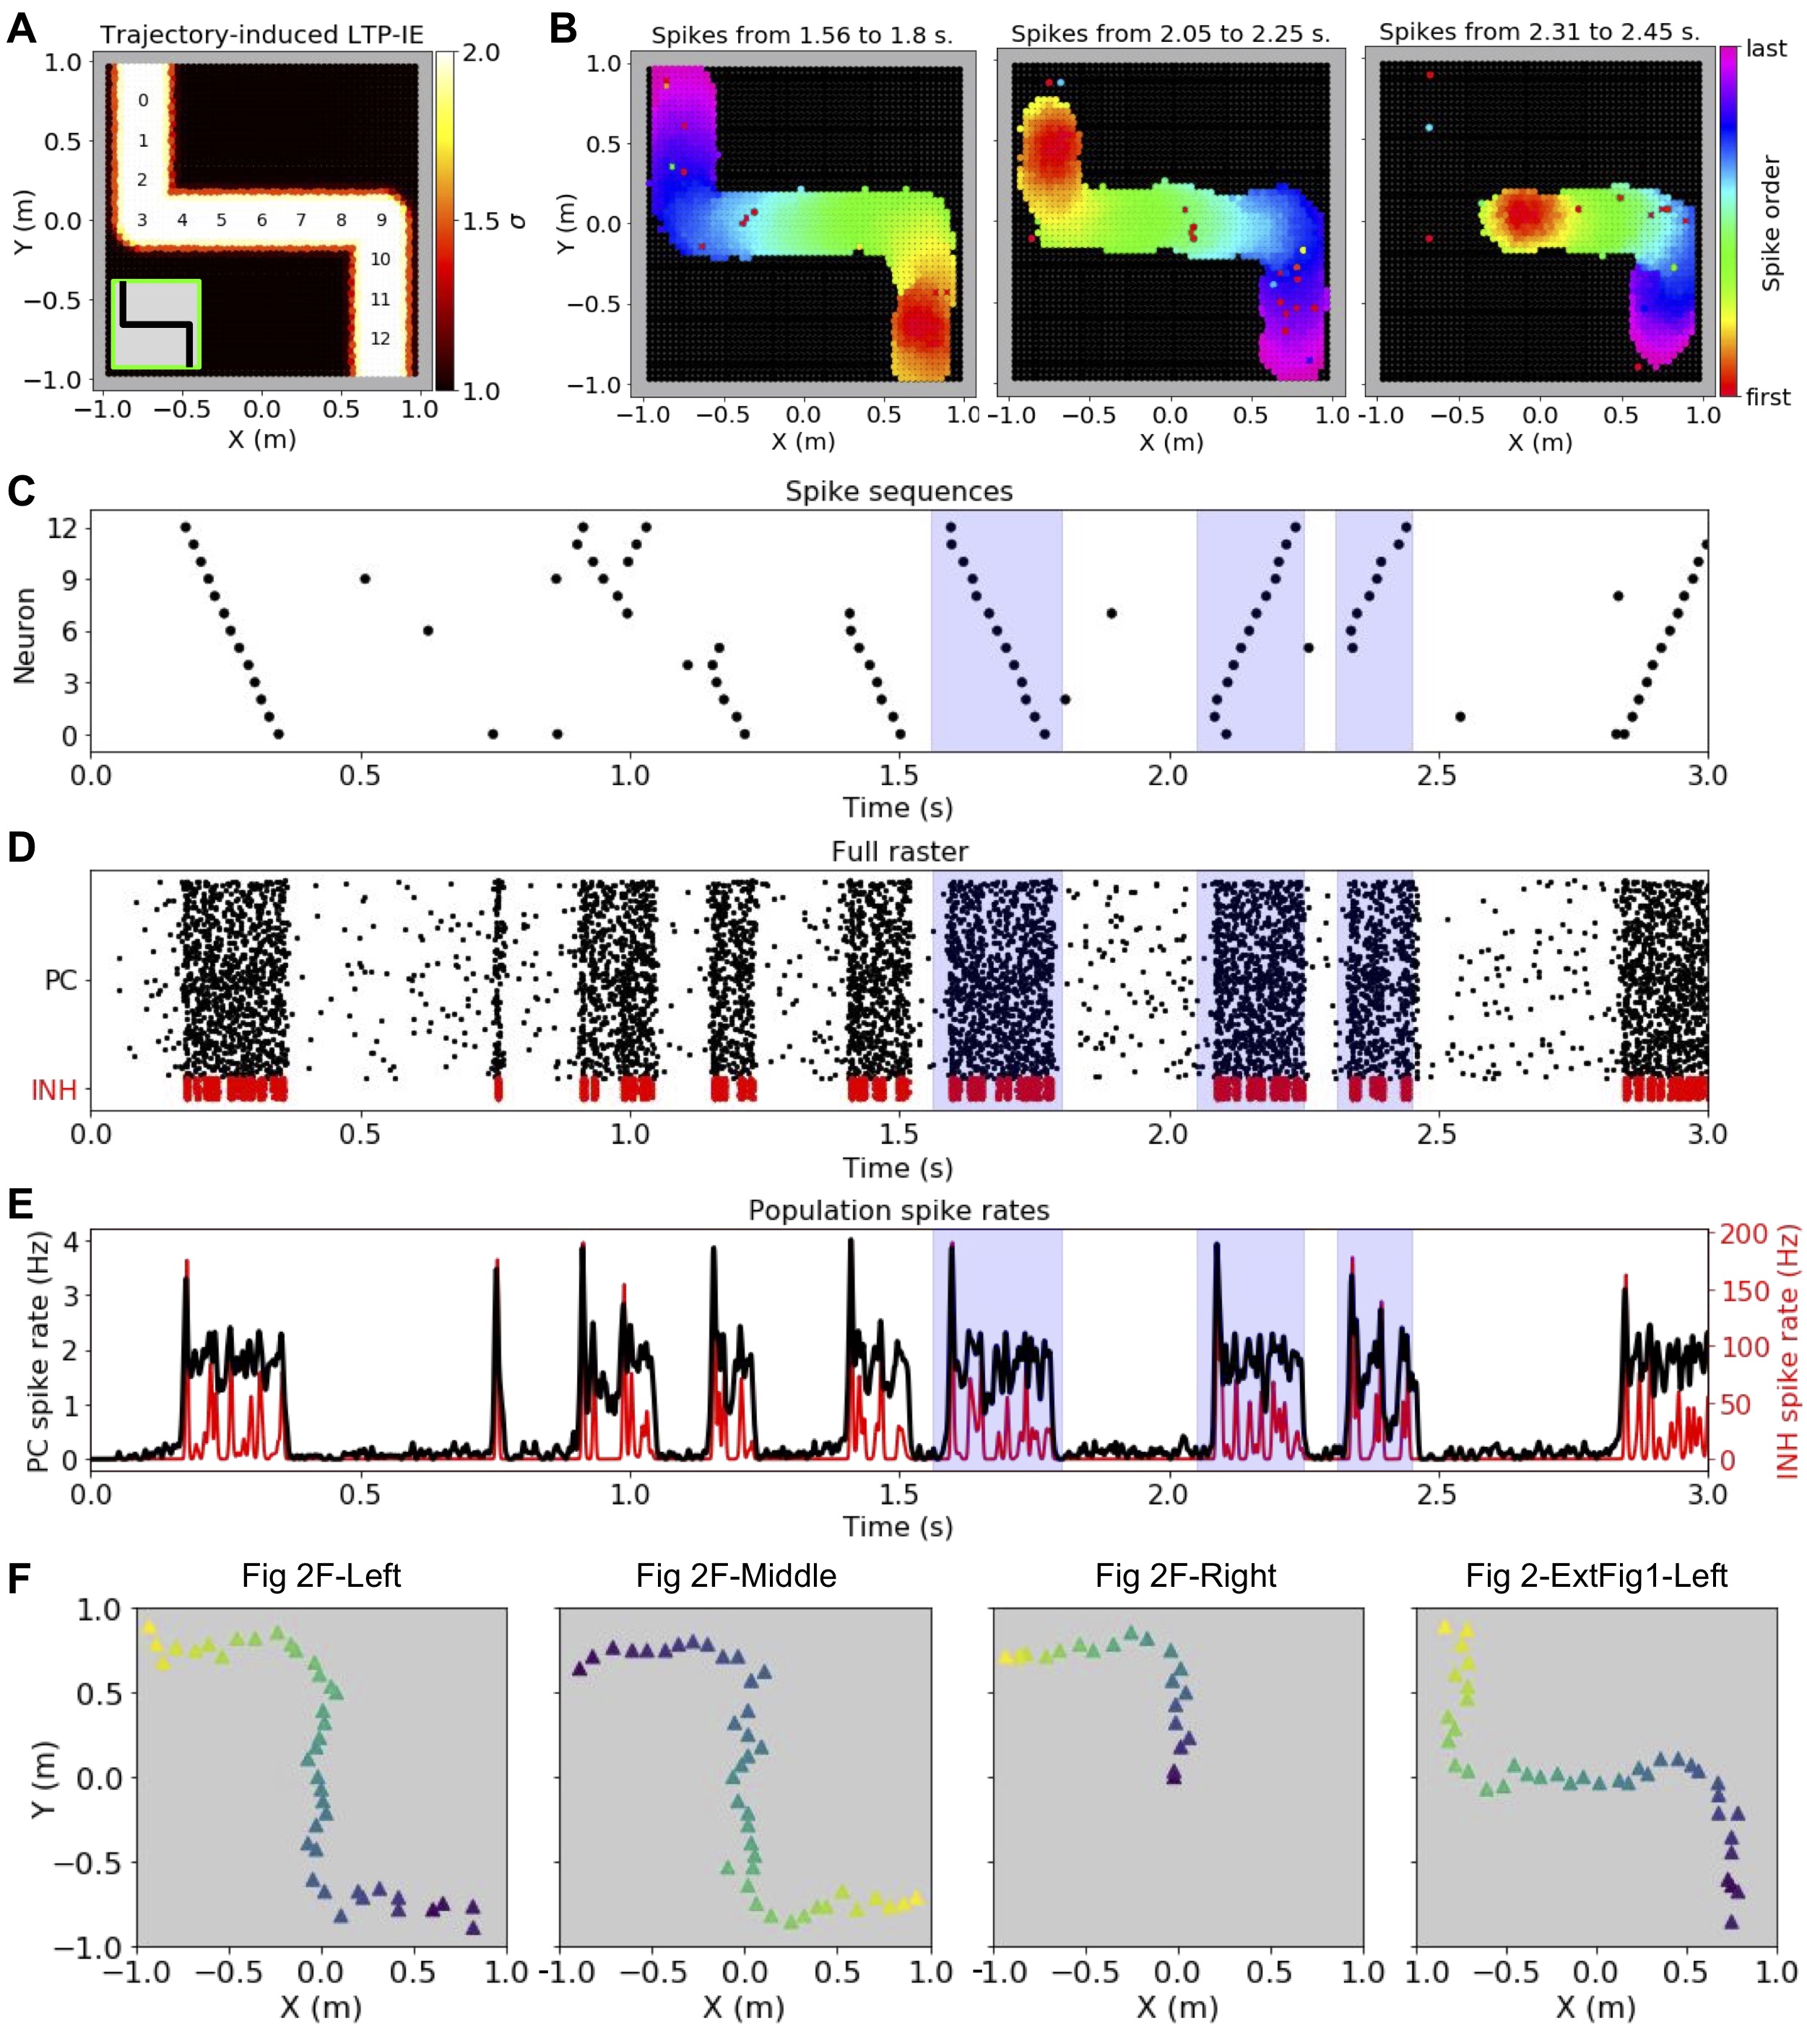

Supplement: supp [file elife-44324-supp-v1.zip › elife_poa_e44324_Figure_2_figure_supplement_1.jpg]
